# Supplementary material
Source: MDPI journal article supplement (https://www.mdpi.com/2304-6740/10/10/159)
Supplement: s1 [file s1]

## Article

# Impregnation of Synthetic Saponites with Aldehydes: A Green Approach in the Intercalation of Bioactive Principles

Stefano Marchesi <sup>1</sup>, Geo Paul <sup>1</sup>, Matteo Guidotti <sup>2</sup>, Stefano Econdi <sup>2,3</sup>, Chiara Bisio <sup>1,2,\*</sup> and Fabio Carniato <sup>1,\*</sup>

<sup>1</sup> Dipartimento di Scienze e Innovazione Tecnologica, Università degli Studi del Piemonte Orientale "Amedeo Avogadro", Viale Teresa Michel 11, 15121 Alessandria, Italy

<sup>2</sup> CNR-SCITEC Istituto di Scienze e Tecnologie Chimiche "G. Natta", Via C. Golgi 19, 20133 Milano, Italy

<sup>3</sup> Dipartimento di Chimica, Università degli Studi di Milano, Via C. Golgi 19, 20133 Milano, Italy

\* Correspondence: chiara.bisio@uniupo.it (C.B.); fabio.carniato@uniupo.it (F.C.); Tel.: +39-0131360216 (C.B.); +39-0131360217 (F.C.)

**Keywords:** synthetic clay; saponite; cetyl trimethyl ammonium; aldehyde; organic/inorganic hybrid material; agriculture

## Electronic Supplementary Information (ESI)

### 1. Figures

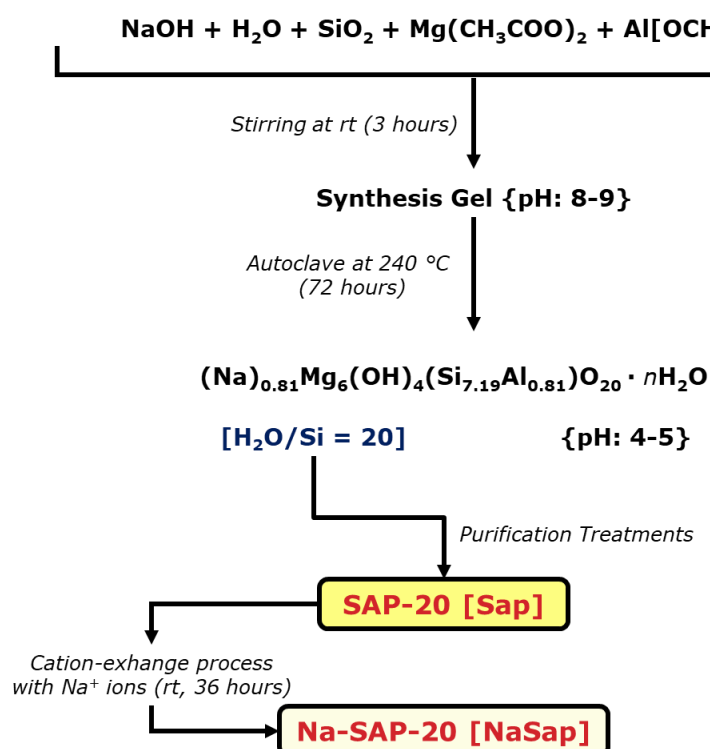

**Scheme 1.** Schematic representation of the hydrothermal synthesis of synthetic saponite clays SAP-20 (Sap) and Na-SAP-20 (NaSap), prepared with a H<sub>2</sub>O/Si ratio of 20 [1,2].

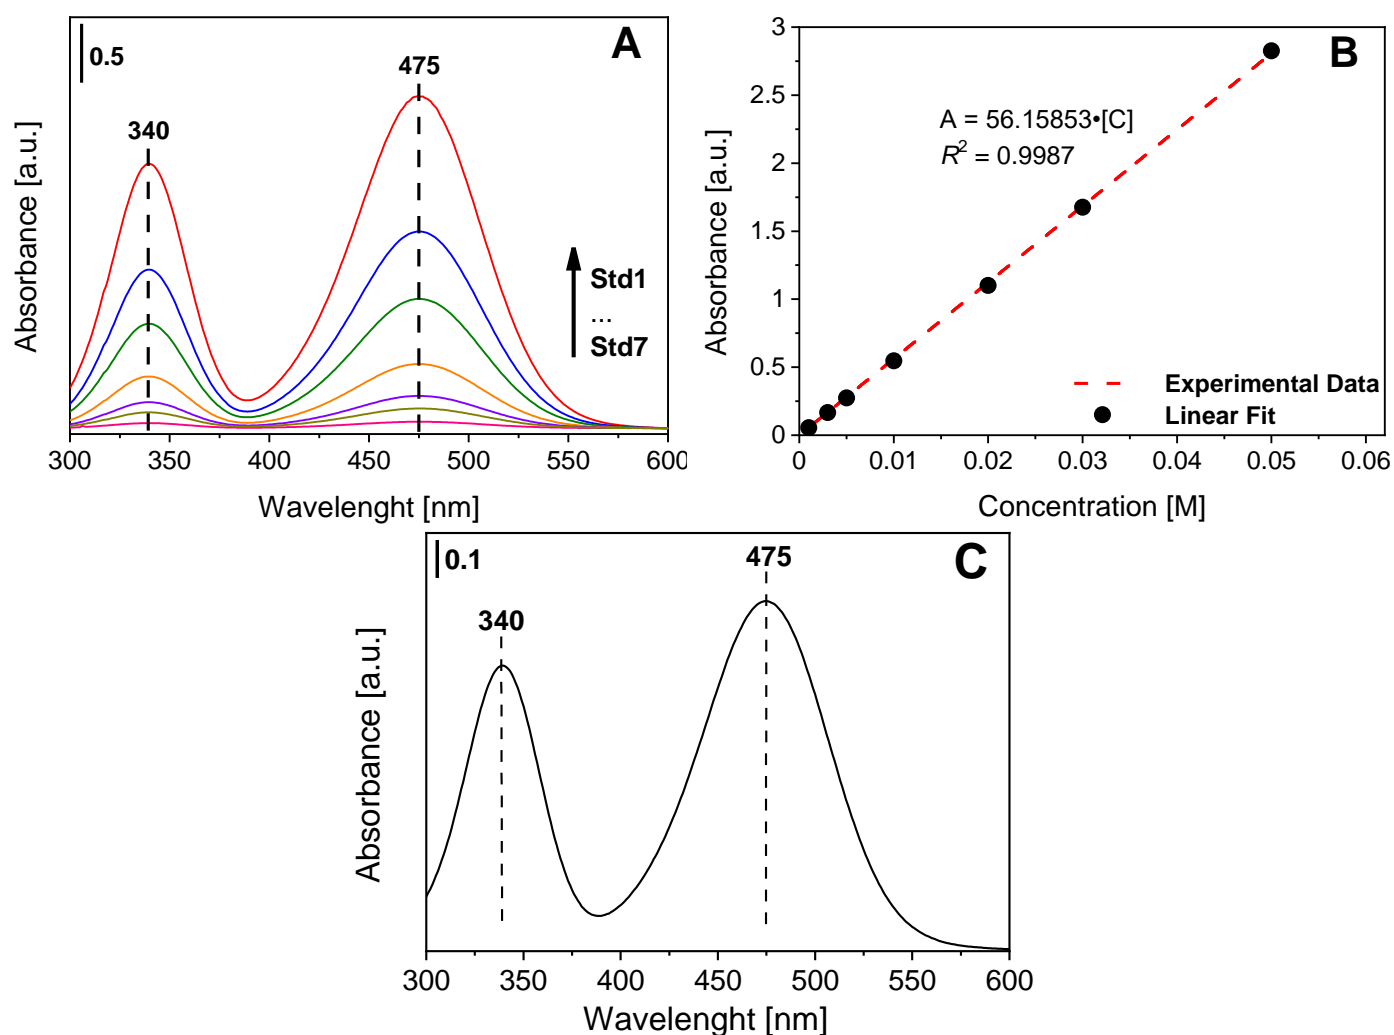

**Figure S1.** (A) UV-Vis spectra of  $[\text{Co}(\text{NH}_3)_6]^{3+}$  standard aqueous solutions at room temperature (concentration range of 0.05–0.005 M) used for the calibration curve. (B) Calibration curve derived from UV-Vis spectra of the standard solutions ( $\lambda_{\text{abs}} = 475 \text{ nm}$ ). (C) UV-Vis spectrum of the supernatant of NaSap sample, obtained after treatment of the solid in 0.02 M  $[\text{Co}(\text{NH}_3)_6]^{3+}$  aqueous solution at room temperature for 60 h; the curve represents the average spectrum obtained after 3 replicates.

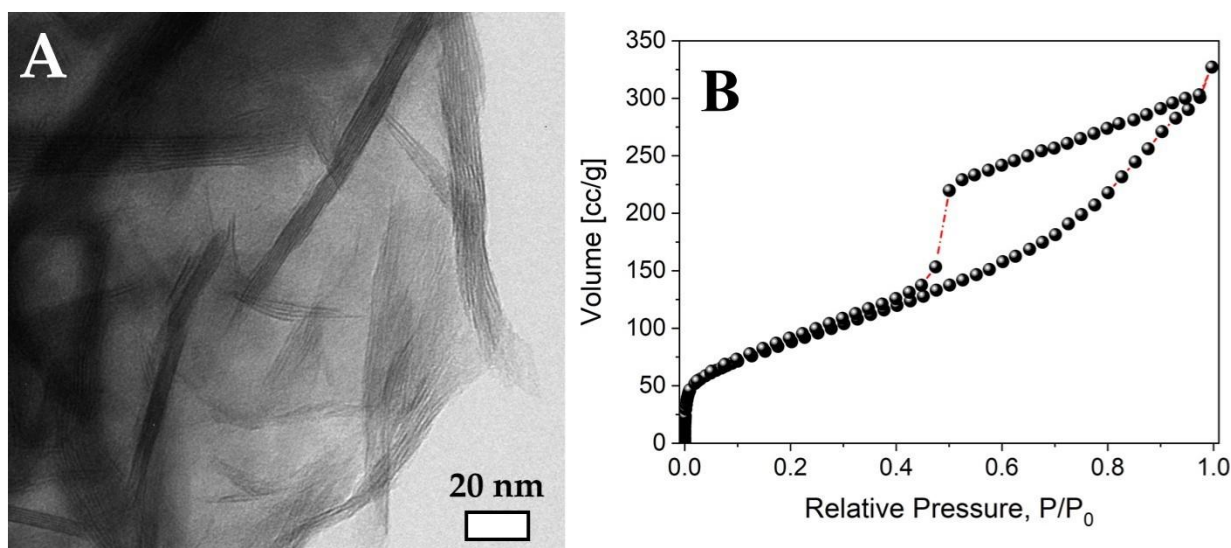

**Figure S2.** (A) TEM micrograph of NaSap sample. (B) N<sub>2</sub> adsorption/desorption isotherm at 77 K of NaSap.

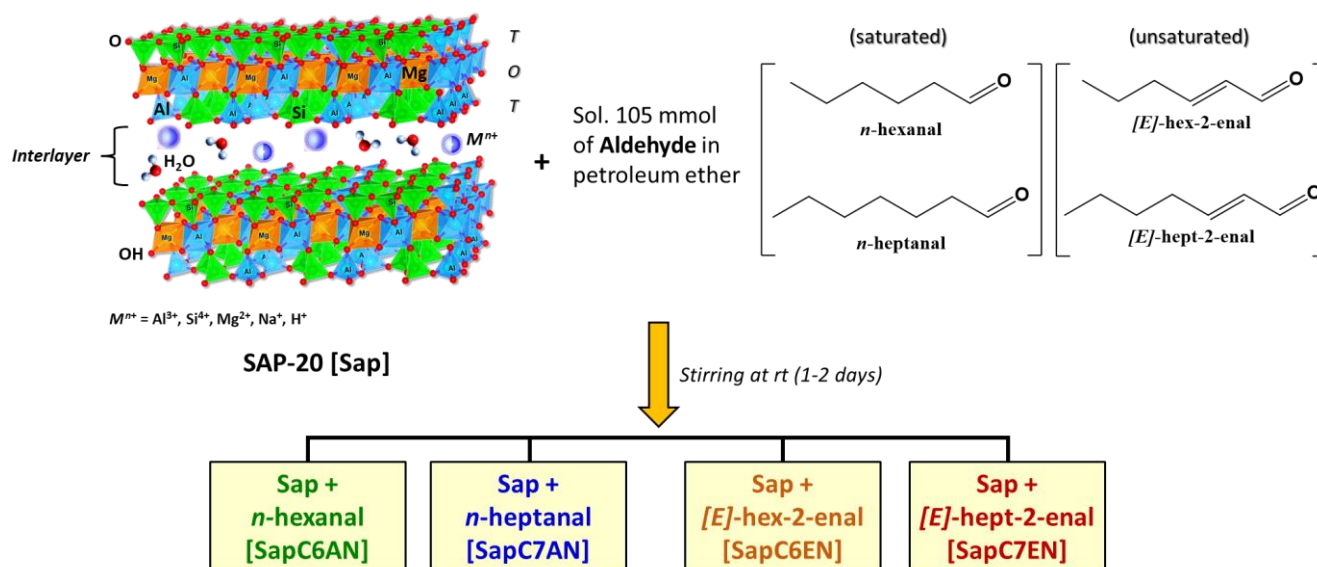

**Scheme 2.** Schematic view of the immobilization procedure of different saturated (*n*-hexanal or C6AN, *n*-heptanal or C7AN) and unsaturated ([*E*]-hex-2-enal or C6EN, [*E*]-hept-2-enal or C7EN) aldehydes in the pristine Sap clay.

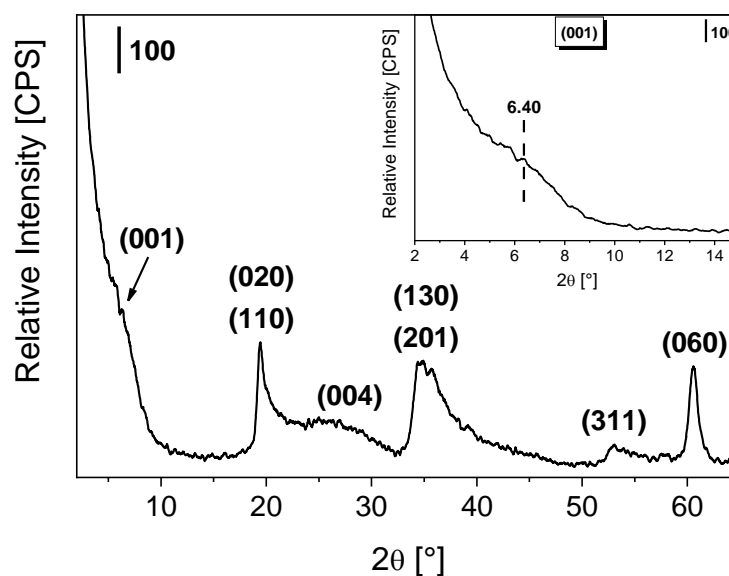

**Figure S3.** X-ray powder diffraction profile of Sap sample, recorded in the 2–65° 2θ range. Magnification of the 2–15° 2θ region, in which the (001) basal plane is present, is reported in the inset.

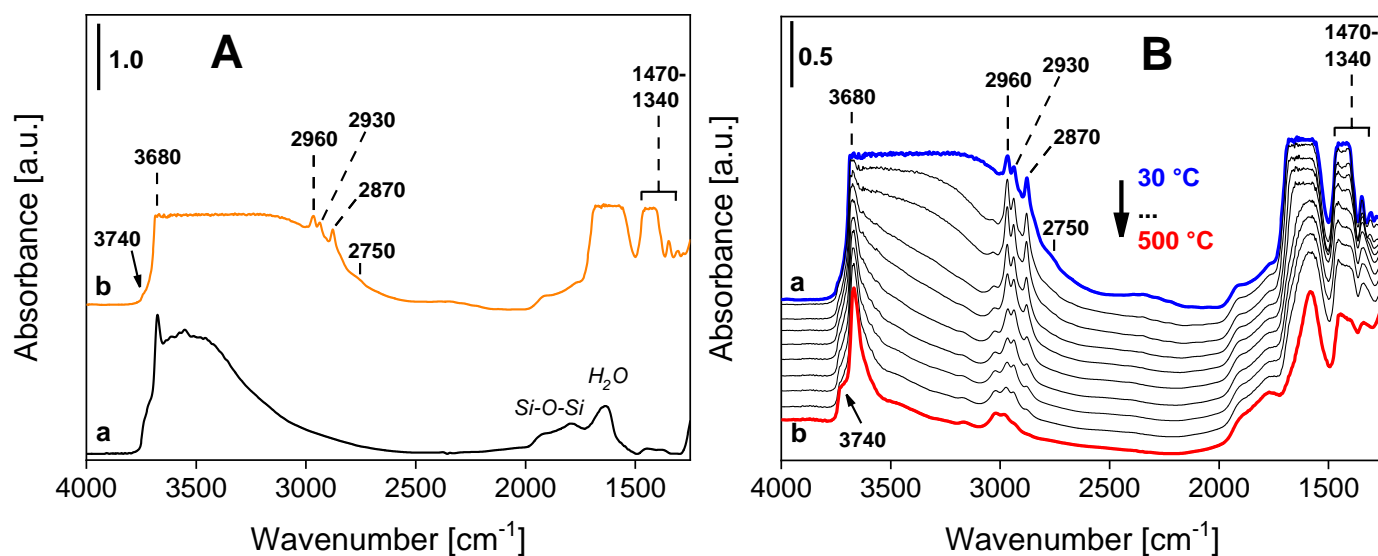

**Figure S4.** (A) FT-IR spectra, in the 4000–1250  $\text{cm}^{-1}$  region, of Sap (a) and SapC6EN (b) samples, measured in vacuum at room temperature on self-supporting pellets. (B) Variable temperature FT-IR spectra of SapC6EN sample, measured in vacuum on a self-supporting pellet, from 30 °C (a) to 500 °C (b).

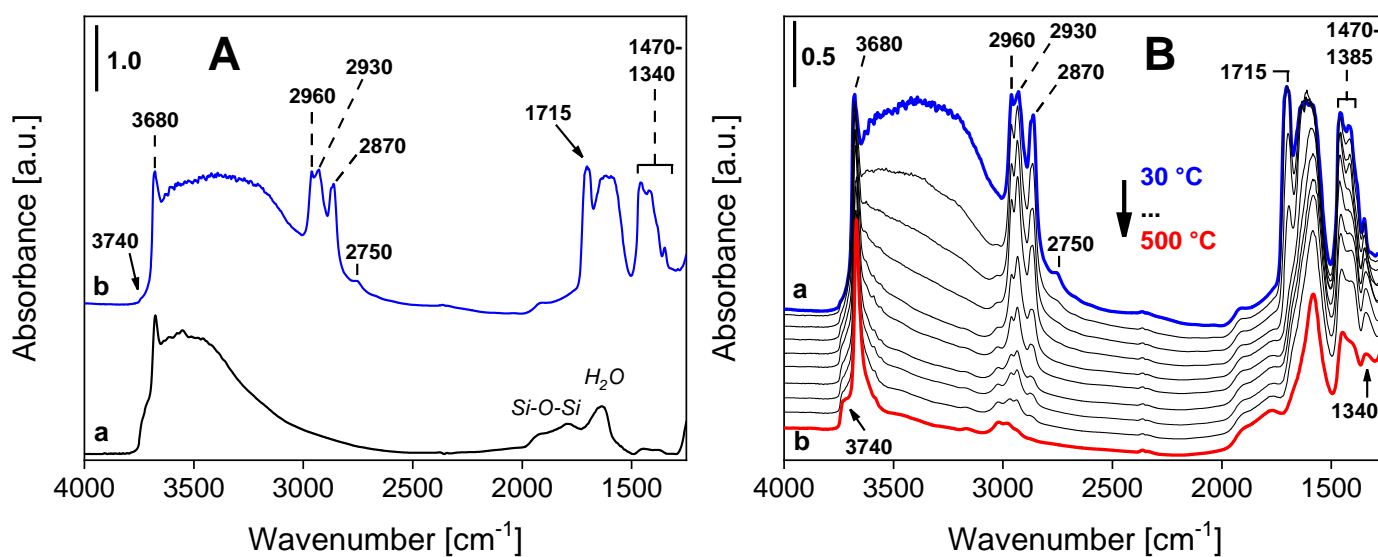

**Figure S5.** (A) FT-IR spectra, in the 4000–1250  $\text{cm}^{-1}$  region, of Sap (a) and SapC7AN (b) samples, measured in vacuum at room temperature on self-supporting pellets. (B) Variable temperature FT-IR spectra of SapC7AN sample, measured in vacuum on a self-supporting pellet, from 30 °C (a) to 500 °C (b).

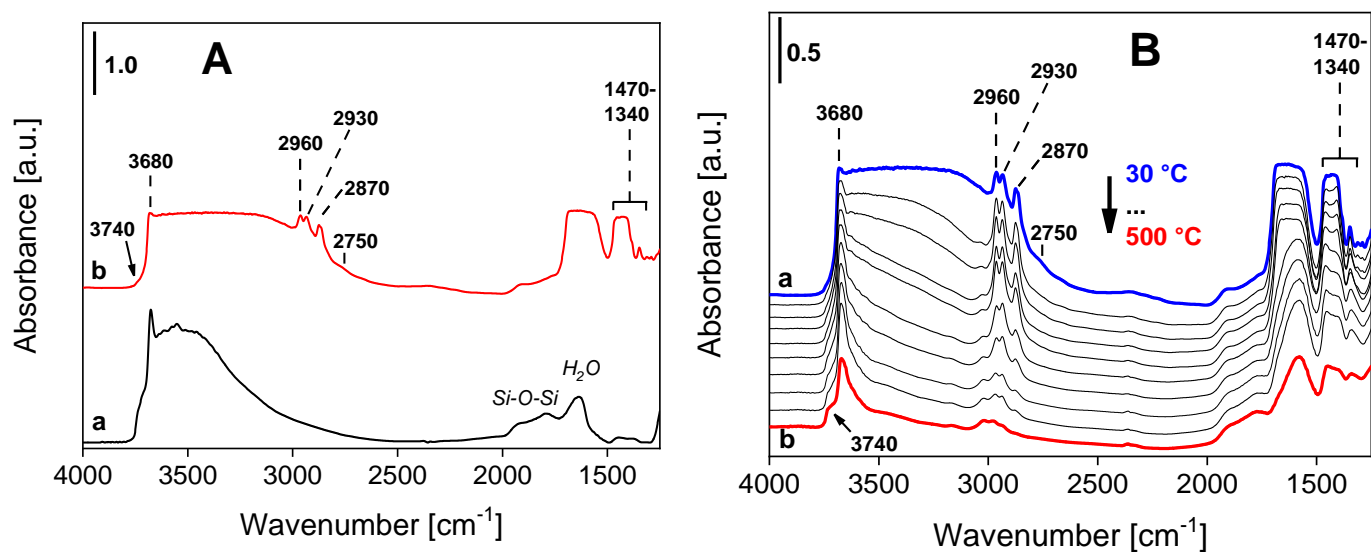

**Figure S6.** (A) FT-IR spectra, in the 4000–1250  $\text{cm}^{-1}$  region, of Sap (a) and SapC7EN (b) samples, measured in vacuum at room temperature on self-supporting pellets. (B) Variable temperature FT-IR spectra of SapC7EN sample, measured *in vacuo* on a self-supporting pellet, from 30 °C (a) to 500 °C (b).

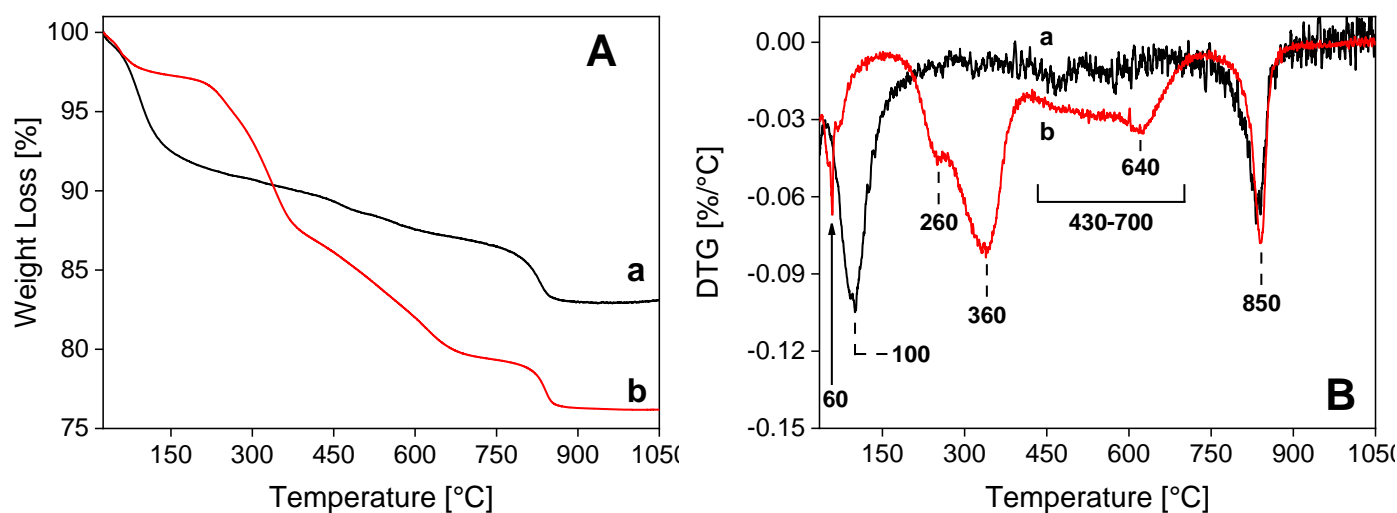

**Figure S7.** TG (A) and DTG (B) curves of NaSap (a) and CTASap (b) samples. The thermogravimetric analyses were carried out under argon flow.

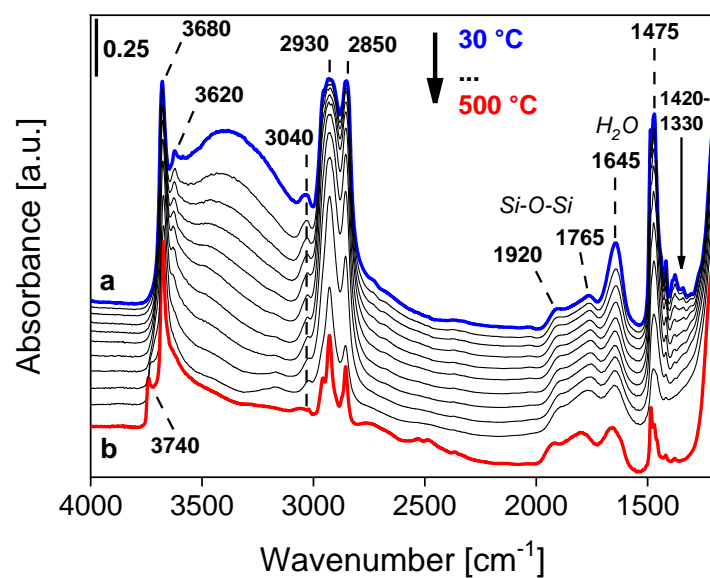

**Figure S8.** Variable temperature FT-IR spectra of CTASap sample, measured *in vacuo* on a self-supporting pellet, from 30 °C (a) to 500 °C (b).

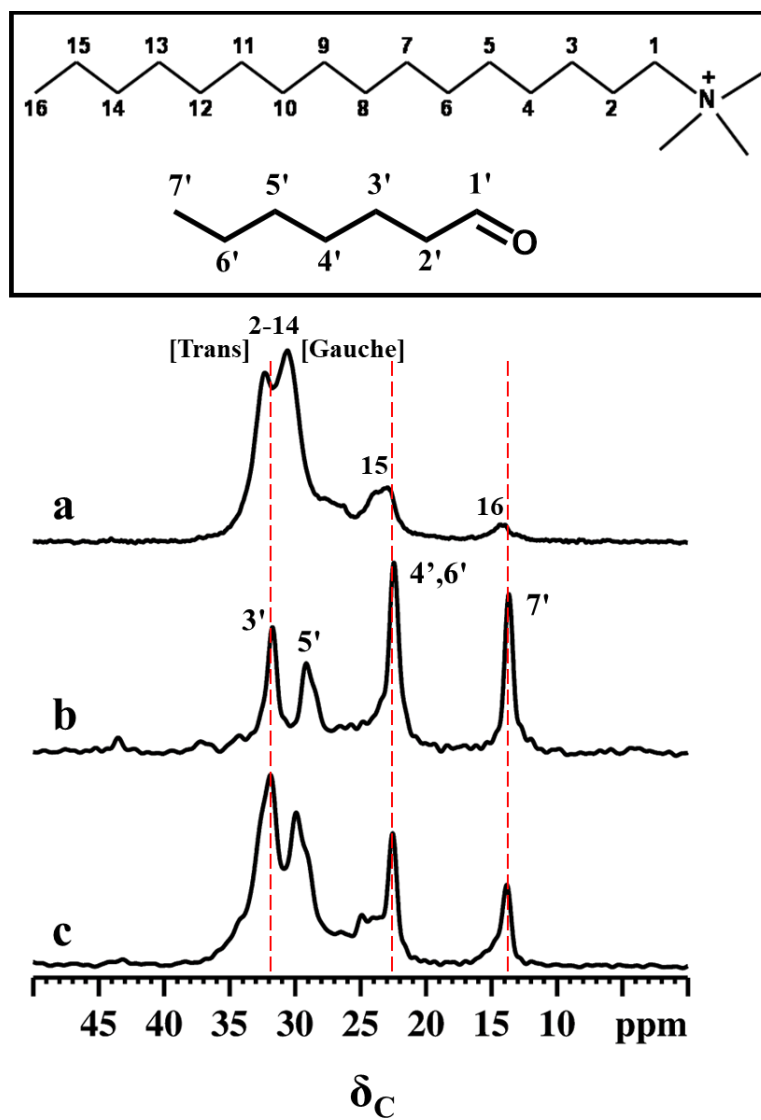

**Figure S9.**  $^{13}\text{C}$  CPMAS NMR spectra of CTASap (a), SapC7AN (b) and CTASapC7AN (c) samples. Only aliphatic region is shown. Inset show the molecular structure of CTA<sup>+</sup> and C7AN molecules.

## 2. Tables

**Table S1.** CHN analysis of CTASap sample.

| Sample | C [wt. %]    | N [wt. %]   | C/N ratio    | CTA <sup>+</sup> [wt. %] | CTA <sup>+</sup> [mmol/g] |
|--------|--------------|-------------|--------------|--------------------------|---------------------------|
| CTASap | 13.43 ± 0.06 | 0.84 ± 0.02 | 15.87 ± 0.41 | 17.42 ± 2.68             | 0.61 ± 0.09               |

**Table S2.** CTA<sup>+</sup> content in the CTASap sample obtained from TG analysis in Figure S7.

| Sample | g CTA <sup>+</sup> / 100 g clay | CTA <sup>+</sup> [mmol/g] |
|--------|---------------------------------|---------------------------|
| CTASap | 19.31                           | 0.68                      |

## References

1. Marchesi, S.; Carniato, F.; Guidotti, M.; Botta, M.; Marchese, L.; Bisio, C. Synthetic Saponite Clays as Promising Solids for Lanthanide Ion Recovery. *New J. Chem.* **2020**, *44*, 10033–10041, doi:10.1039/C9NJ05983K.
2. Marchesi, S.; Nascimbene, S.; Guidotti, M.; Bisio, C.; Carniato, F. Application of NMR Relaxometry for Real-Time Monitoring of the Removal of Metal Ions from Water by Synthetic Clays. *Dalton Trans.* **2022**, *51*, 4502–4509, doi:10.1039/D1DT04344G.
